# Supplementary material
Source: Springer Nature journal article supplement (https://www.springermedizin.de/resource/supplementary/12889_2013_6677_MOESM2_ESM.pdf/9498750)
Supplement: MOESM2 [file 9498750]

**Catalan Population (2010)**

7,434,632  
individuals  
(81% urban)

**Catalan Health Institute  
(SIDIAP)**

5,501,784  
individuals  
(81% urban, 19% rural)

**Other providers**

1,932,848  
individuals

**SIDIAP-Q**

1,833,125  
individuals  
(85% urban, 15% rural)

**SIDIAP-Q**

n= 1,558,156  
Urban

**SIDIAP-Q**

n= 274,969  
Rural

**Patients included:**

≥19 years old  
1,356,761
